# Supplementary material for: What should be included in case report forms? Development and application of novel methods to inform surgical study design: a mixed methods case study in parastomal hernia prevention
Source: HighWire-hosted journal article supplement (doi:10.1136/bmjopen-2022-061300), 2022-10-01
Supplement: bmjopen-2022-061300supp002_data_supplement.pdf [file bmjopen-2022-061300supp002_data_supplement.pdf]

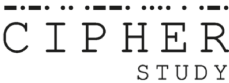

The CIPHER Study

SURGICAL TECHNIQUE

TH1

Patient Initials:

CIPHER Study ID:

SURGEON DETAILS

Most senior surgeon scrubbed in at time of stoma formation:

Name: \_\_\_\_\_ GMC number: \_\_\_\_\_

PATIENT DETAILS

Operation date:    

Operation start time  
(defined as knife to skin: time):                      \_\_\_\_ : \_\_\_\_

Operation end time  
(defined as time of final skin suture in wound):                      \_\_\_\_ : \_\_\_\_

Month of birth:    \_\_\_\_                      Year of birth:    \_\_\_\_

Patient's Sex:                      Male ☐                      Female ☐

SURGICAL APPROACH TO STOMA FORMATION

Indication for surgery (*please select one option*):

Tumour – benign

☐

Tumour – malignant

☐

Diverticular Disease

☐

Functional Intestinal Disorder

☐

Inflammatory Bowel Disease (IBD)

☐

IBD – Crohn's

☐

IBD – Ulcerative Colitis

☐

Other

☐

If other, specify: \_\_\_\_\_

ASA Classification:

I

☐

II

☐

III

☐

IV

☐

V

☐

-----  
**CIPHER**  
 STUDY

The CIPHER Study  
**SURGICAL TECHNIQUE**

**TH<sub>1</sub>**

Patient Initials:

|  |  |  |
|--|--|--|
|  |  |  |
|--|--|--|

CIPHER Study ID:

|  |  |  |   |  |  |  |  |
|--|--|--|---|--|--|--|--|
|  |  |  | - |  |  |  |  |
|--|--|--|---|--|--|--|--|

**Name of procedures (tick YES or NO as appropriate for each):**

|                                                                         | Yes                      | No                       |
|-------------------------------------------------------------------------|--------------------------|--------------------------|
| Small bowel resection                                                   | <input type="checkbox"/> | <input type="checkbox"/> |
| Colectomy: left<br>(including sigmoid colectomy and anterior resection) | <input type="checkbox"/> | <input type="checkbox"/> |
| Colectomy: right<br>(including ileocaecal resection)                    | <input type="checkbox"/> | <input type="checkbox"/> |
| Colectomy: subtotal or panproctocolectomy                               | <input type="checkbox"/> | <input type="checkbox"/> |
| Hartmann's procedure                                                    | <input type="checkbox"/> | <input type="checkbox"/> |
| Colorectal resection – other                                            | <input type="checkbox"/> | <input type="checkbox"/> |
| Reduction of volvulus                                                   | <input type="checkbox"/> | <input type="checkbox"/> |
| Strictureplasty                                                         | <input type="checkbox"/> | <input type="checkbox"/> |
| Drainage of abscess/collection                                          | <input type="checkbox"/> | <input type="checkbox"/> |
| Debridement                                                             | <input type="checkbox"/> | <input type="checkbox"/> |
| Abdominoperineal excision                                               | <input type="checkbox"/> | <input type="checkbox"/> |
| Posterior pelvic exenteration                                           | <input type="checkbox"/> | <input type="checkbox"/> |
| Repair or revision of anastomosis                                       | <input type="checkbox"/> | <input type="checkbox"/> |
| Repair of intestinal fistula                                            | <input type="checkbox"/> | <input type="checkbox"/> |
| Resection of other intra-abdominal tumour(s)                            | <input type="checkbox"/> | <input type="checkbox"/> |
| Stoma formation                                                         | <input type="checkbox"/> | <input type="checkbox"/> |
| Other                                                                   | <input type="checkbox"/> | <input type="checkbox"/> |

If other, specify: \_\_\_\_\_

If YES to **abdominoperineal excision** or **posterior pelvic exenteration**:

Vertical rectus abdominis myocutaneous (VRAM) flap Yes ☐ No ☐

Intended type of access used (**please select one**):

|              |                          |
|--------------|--------------------------|
| SLS          | <input type="checkbox"/> |
| Laparoscopic | <input type="checkbox"/> |
| Robotic      | <input type="checkbox"/> |
| Open         | <input type="checkbox"/> |
| Trephine     | <input type="checkbox"/> |

Intended type of procedure converted to open: Yes ☐ No ☐  
 (**Do not answer if intended type of access was open**)

The CIPHER Study  
**SURGICAL TECHNIQUE**

**TH<sub>1</sub>**

Patient Initials:

  

CIPHER Study ID:

   -    

 Envisaged longevity of stoma: Permanent ☐ Uncertain ☐
Type of stoma formed (*please select one*):

- End ☐
- Loop ☐
- Loop end ☐
- Double barrelled ☐
- Other ☐

If **loop**, with or without rod: With ☐

Without ☐

Section of bowel used to form functioning end of stoma (*please select one*):

- Jejunum ☐
- Ileum ☐
- Ascending colon ☐
- Transverse colon ☐
- Descending colon ☐
- Sigmoid colon ☐

Stoma site pre-marked (*please select one*):

- Not preserved ☐
- Preserved with suture ☐
- Pre-marked with pen ☐

If **preserved with suture** or **pre-marked with pen**,Stoma site marked by (*please select one*):

- Stoma nurse ☐
- Surgeon ☐
- Non-specialist nurse ☐
- Other ☐

If other, specify: \_\_\_\_\_

Stoma formed at pre-marked site: Yes ☐ No ☐

 Route of stoma: Trans-peritoneal ☐ Extra-peritoneal ☐

The CIPHER Study  
**SURGICAL TECHNIQUE**

**TH<sub>1</sub>**

Patient Initials:

  

CIPHER Study ID:

   -    
**TREPHINE FORMATION**

Subcutaneous tissue excised:

Yes ☐ No ☐Relationship of the muscle layer incision to the rectus abdominis (***please select one***):

Outside of the rectus sheath (within oblique abdominal muscles)

☐**Continue on next page**

Within the rectus sheath - through the belly of the rectus abdominis

☐

Within the rectus sheath - lateral to the belly of the rectus abdominis

☐

Complete the box below

Anterior sheath: was a laparoscopic trocar used to puncture the anterior sheath  
(***Only answer for laparoscopic or robotic procedures***)Yes ☐ No ☐

Anterior sheath: size of incision [widest diameter in mm] \_\_\_\_\_

Anterior sheath: Shape of incision (***please select one***)

Linear - horizontal

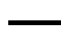☐

Linear - vertical

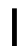☐

Cruciate

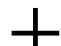☐

Circular

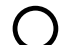☐

Other

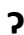☐

Anterior sheath: was any of the anterior sheath removed

Yes ☐ No ☐

Anterior sheath: adjustments made to the size of the incision

Yes ☐ No ☐Posterior sheath: was a laparoscopic trocar used to puncture the posterior sheath  
(***Only answer for laparoscopic or robotic procedures***)Yes ☐ No ☐

Posterior sheath: size of incision [widest diameter in mm] \_\_\_\_\_

Posterior sheath: Shape of incision (***please select one***)

Linear - horizontal

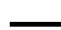☐

Linear - vertical

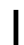☐

Cruciate

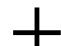☐

Circular

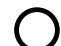☐

Other

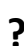☐

Posterior sheath: was any of the posterior sheath removed

Yes ☐ No ☐

Posterior sheath: adjustments made to the size of the incision

Yes ☐ No ☐

The CIPHER Study  
**SURGICAL TECHNIQUE**

# TH<sub>1</sub>

Patient Initials:

  

CIPHER Study ID:

   -    

Muscle fibres separated with blunt dissection

Yes ☐ No ☐

Intra-operative vessel damage - epigastric vessel

Yes ☐ No ☐Location of trephine in relation to port site (***please select one***):**(Only answer for laparoscopic or robotic procedures, including procedures converted to open)**Trephine created at the port site as the beginning of procedure  
(then subsequently used as port site)☐

Trephine created at end of procedure (conversion of port site to trephine)

☐

Trephine created in a location other than port site

☐Were sutures used to buttress the incision (***please select one***):**(Only answer if relationship of the muscle layer incision to the rectus abdominis is “within rectus sheath”)**

Anterior sheath only

☐

Posterior sheath only

☐

Both anterior and posterior sheath

☐

Anterior and posterior sheath sutured together

☐

No

☐

The CIPHER Study  
**SURGICAL TECHNIQUE**

**TH<sub>1</sub>**

Patient Initials:

  

CIPHER Study ID:

   -   
**REINFORCING THE STOMA TREPHINE WITH MESH**

Was mesh used to reinforce the stoma trephine

Yes ☐No ☐

If YES, complete the box below

If NO,  
continue on  
next page

Mesh product code (attach product sticker)

**Attach product sticker here**

Mesh cut or adjusted

Yes ☐No ☐

If YES,

Cranio-caudal length of mesh inserted if changed from original [in cm]

Medio-lateral length of mesh inserted if changed from original [in cm]

Diameter of mesh inserted if changed from original [in cm]

Shape of mesh inserted if changes from original (**please select one**):

3D/funnel

☐

Circular/Oval

☐

Square/rectangular

☐

No change in shape

☐
Location of mesh replacement (**please select one**):

Sublay/pre-peritoneal/retro-rectus

☐

Underlay/intra-peritoneal

☐

Onlay

☐
Route used to position mesh (**please select one**):

Through the main operative incision

☐

Through the stoma trephine

☐

Via a port

☐

What shape was the hole in the mesh?

Cruciate ☐Circular/oval ☐Slit ☐None (Sugarbaker) ☐What size was the hole in the mesh [in mm] 

Mesh secured to abdominal wall (including sheath, muscle, peritoneum)

Yes ☐No ☐

Mesh secured to stoma serosa

Yes ☐No ☐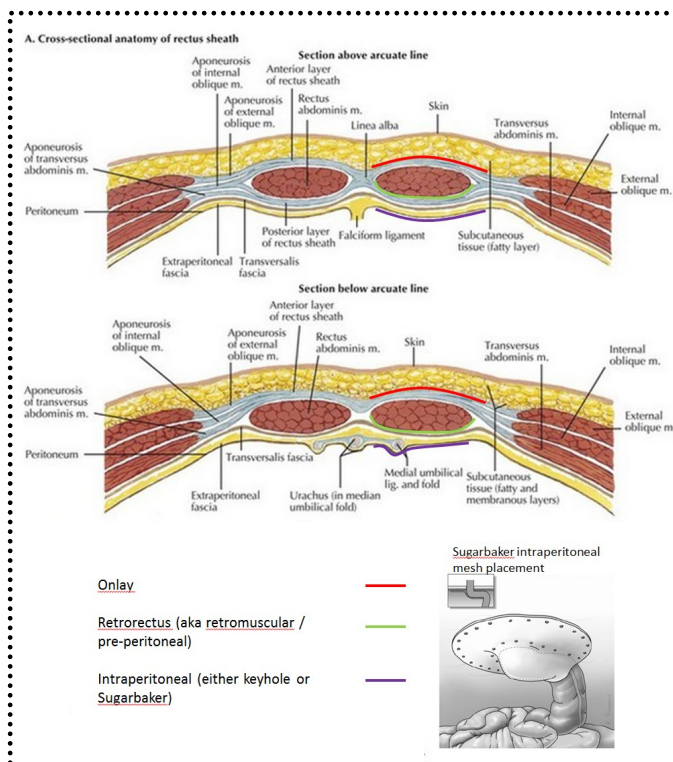

The CIPHER Study

SURGICAL TECHNIQUE

TH<sub>1</sub>

Patient Initials:

CIPHER Study ID:

-

USE OF THE STOMA TREPHINE AS A SPECIMEN EXTRACTION SITE

Stoma trephine used as an extraction site

Yes

No

CLOSURE OF OTHER WOUNDS FORMED DURING THE PROCEDURE

Main abdominal incision (*please select one*):

Small bite closure

Large bite closure

N/A

Biggest port size [in mm]

(Only answer for laparoscopic or robotic procedures, including procedures converted to open)

Closure of deep layer

Yes

No

(Only answer for laparoscopic or robotic procedures, including procedures converted to open)

dures con-

SPOUTING THE STOMA LUMEN

Has the stoma been spouted

Yes

No

COMMENTS

Who has collated this data?

GMC/NMC number:

Date completed:  /  /
